# Supplementary material for: Co-Circulation of Leishmania Parasites and Phleboviruses in a Population of Sand Flies Collected in the South of Portugal
Source: MDPI journal article supplement (doi:10.3390/tropicalmed9010003), 2023-12-20
Supplement: s1 [file s1]

Supplementary Table S1: Geographical coordinates of the surveyed sites

| Collection site | Latitude  | Longitude | Municipality | Parish          | Type of animal facility              | Sand fly presence | Detected pathogens                  |
|-----------------|-----------|-----------|--------------|-----------------|--------------------------------------|-------------------|-------------------------------------|
| Alg1            | 37.034308 | -7.813126 | Olhão        | Quelfes         | Wildlife recovery centre             | No                |                                     |
| Alg2            | 37.132019 | -7.679487 | Tavira       | Santiago        | Chicken hen                          | Yes               |                                     |
| Alg3            | 37.161070 | -7.653302 | Tavira       | Santa Maria     | Chicken hen                          | Yes               | <i>Leishmania</i> and phleboviruses |
| Alg4            | 37.045441 | -7.888368 | Olhão        | Conceição       | Chicken hen                          | Yes               |                                     |
| Alg5            | 37.070583 | -7.893326 | Olhão        | Conceição       | Rabbit hut in a pedagogical farm     | Yes               | <i>Leishmania</i>                   |
| Alg6            | 37.127178 | -8.051329 | Loulé        | Loulé           | Animal shelter (dogs, cats, donkeys) | Yes               |                                     |
| Alg7            | 37.142954 | -8.042016 | Loulé        | S.Sebastião     | Chicken hen                          | Yes               |                                     |
| Alg8            | 37.125607 | -7.980422 | Loulé        | S. Bárbara Nexe | Horse enclosure                      | Yes               |                                     |
| Alg9            | 37.061411 | -7.779654 | Olhão        | Moncarapacho    | Kennel                               | Yes               |                                     |
| Alg10           | 37.044877 | -7.806156 | Olhão        | Quelfes         | Chicken hen                          | Yes               |                                     |
| Alg11           | 37.049138 | -7.828777 | Olhão        | Quelfes         | Kennel                               | Yes               |                                     |
| Alg12           | 37.023950 | -7.842566 | Olhão        | Olhão           | Pigeonry                             | No                |                                     |
| Alg13           | 37.037715 | -7.832078 | Olhão        | Olhão           | Chicken hen                          | No                |                                     |
| Alg14           | 37.040103 | -7.887072 | Olhão        | Conceição       | Kennel                               | Yes               |                                     |
| Alg15           | 37.193799 | -8.032382 | Loulé        | Tôr             | Chicken hen                          | Yes               |                                     |
| Alg16           | 37.072063 | -7.789237 | Olhão        | Moncarapacho    | Kennel                               | Yes               |                                     |
